# Supplementary material for: Insoluble oxalates modified K2XF6:Mn4+ (X = Ti, Ge, Si) red-emitting phosphors exhibiting excellent moisture resistance and luminescence for warm white light-emitting diodes
Source: Royal Society of Chemistry journal article supplement (doi:10.1039/d2ma01023b), 2023-01-01
Supplement: d2ma01023b1.pdf [file d2ma01023b1.pdf]

## Supporting Information

### Insoluble oxalates modified $K_2XF_6:Mn^{4+}$ (X = Ti, Ge, Si) red-emitting phosphors exhibiting excellent moisture resistance and luminescence for warm white light-emitting diodes

Lidan Han, Rui Zhang\*, Yanhui Chen, Chen Jiang, Xiaoli Wu

Key Laboratory of Nonferrous Materials and New Processing Technology, Ministry of Education; Guangxi Key Laboratory of Optical and Electronic Materials and Devices; College of Materials Science and Engineering, Guilin University of Technology, Guilin, 541004, P. R. China

\* Corresponding author.

E-mail: rzhang@glut.edu.cn (R. Zhang)

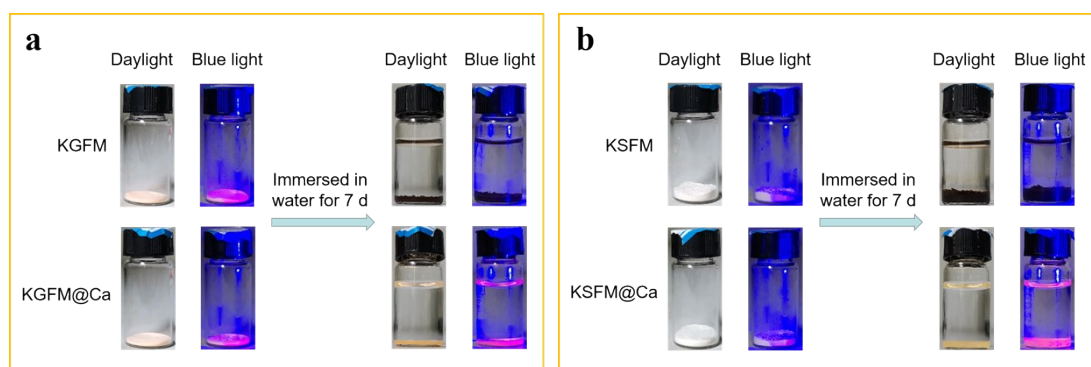

Fig. S1 Photographs of (a) KGFM and KGFM@Ca, (b) KSFM and KSFM@Ca in air and water.

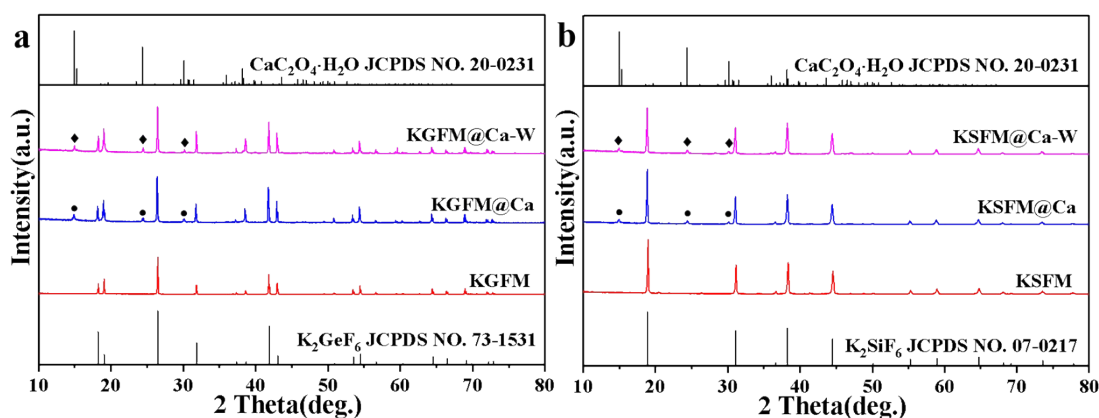

Fig. S2 (a) XRD patterns of KGFM, KGFM@Ca and KGFM@Ca-W; (b) XRD patterns of KSFM, KSFM@Ca and KSFM@Ca-W.

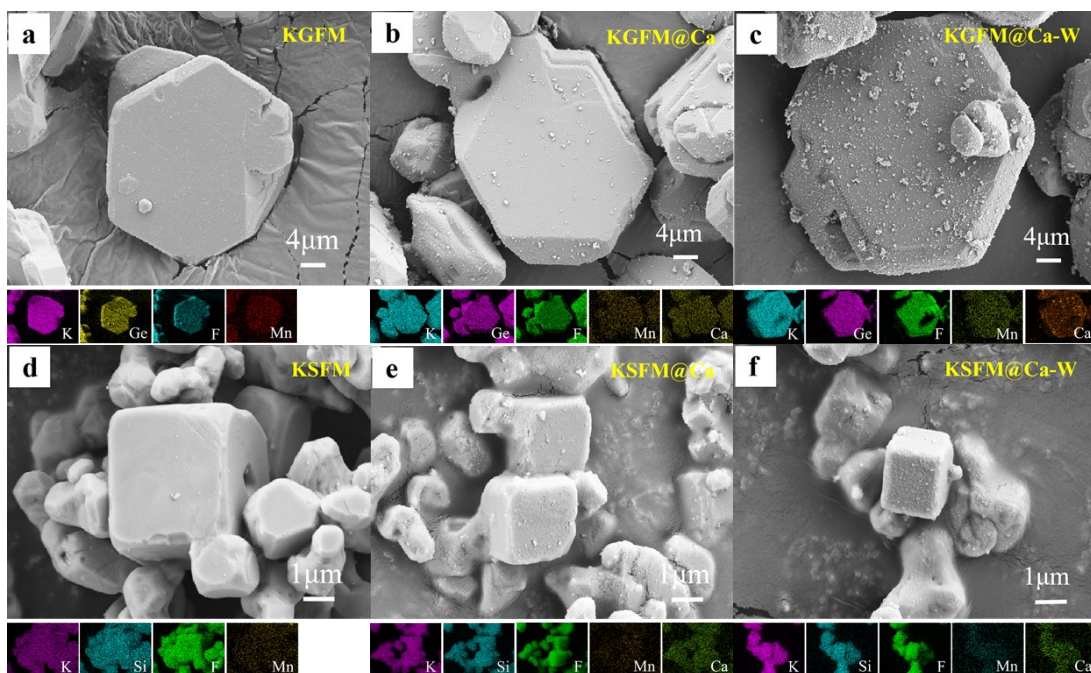

Fig. S3 (a)-(c) SEM and EDS mapping images of KGFM, KGFM@Ca and KGFM@Ca-W; (d)-(f) SEM and EDS mapping images of KSFM, KSFM@Ca and KSFM@Ca-W.

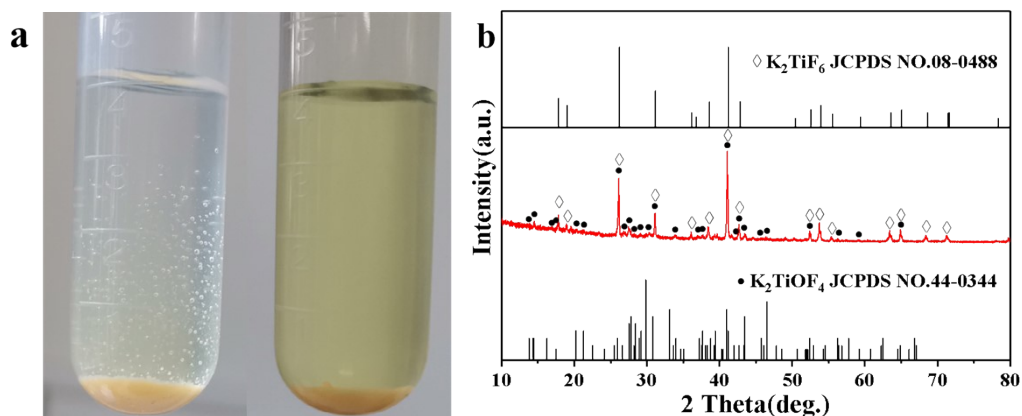

Fig. S4 (a) Photographs of KTFM@Ca-W immersed in water for different times (Left: incipient, Right: 7 days); (b) XRD patterns of the products evaporated from yellowish solution.

Table S1 ICP results of KTFM@Ca and KTFM@Ca-W phosphors

| Samples   | $C_{Mn}$ [mol%] | $C_{Ti}$ [mol%] | $C_{Ca}$ [mol%] |
|-----------|-----------------|-----------------|-----------------|
| KTFM@Ca   | 2.82            | 57.04           | 40.14           |
| KTFM@Ca-W | 2.04            | 58.23           | 39.73           |

Table S2 The key optoelectronic parameters of devices operated at 3.2 V and 320 mA

| Devices | Yellow / red phosphor ratio | Chromaticity coordinates | LE (lm/W) | CCT (K) | R <sub>a</sub> |
|---------|-----------------------------|--------------------------|-----------|---------|----------------|
| LED-0   | 1:0                         | (0.3349, 0.3604)         | 100.4     | 5410    | 72.0           |
| LED-1   | 1:1                         | (0.3530, 0.3825)         | 87.9      | 4838    | 77.3           |
| LED-2   | 1:2                         | (0.3738, 0.3909)         | 79.0      | 4275    | 81.7           |
| LED-3   | 1:3                         | (0.3847, 0.3934)         | 74.3      | 4007    | 85.4           |

Table S3 The key optoelectronic parameters of LED-2 operated at various currents

| Current (mA) | Chromaticity coordinates | LE (lm/W) | CCT (K) | R <sub>a</sub> |
|--------------|--------------------------|-----------|---------|----------------|
| 40           | (0.3800, 0.4020)         | 120.5     | 4179    | 83.0           |
| 80           | (0.3788, 0.3996)         | 112.3     | 4195    | 82.7           |
| 120          | (0.3777, 0.3977)         | 104.9     | 4213    | 82.4           |
| 160          | (0.3764, 0.3964)         | 98.2      | 4238    | 82.2           |
| 200          | (0.3760, 0.3952)         | 92.5      | 4241    | 82.0           |
| 240          | (0.3753, 0.3937)         | 87.6      | 4250    | 81.9           |
| 280          | (0.3745, 0.3923)         | 83.1      | 4265    | 81.8           |
| 320          | (0.3738, 0.3909)         | 79.0      | 4275    | 81.7           |
